# Supplementary material
Source: Springer Nature journal article supplement (https://www.springermedizin.de/resource/supplementary/12914_2010_128_MOESM2_ESM.pdf/9536822)

# Health workers save lives!

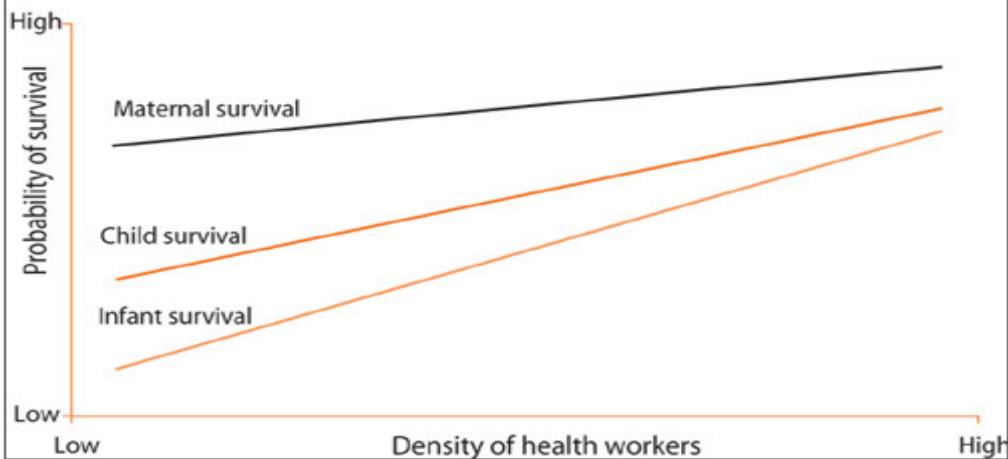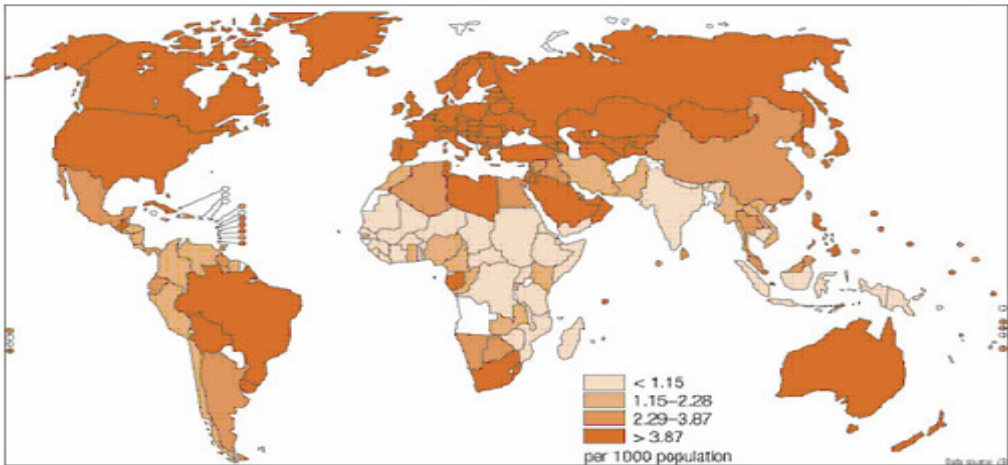

Supplement: MOESM2 [file 9536822]
